# Supplementary material for: Improving the Powder Properties of an Active Pharmaceutical Ingredient (Ethenzamide) with a Silica Nanoparticle Coating for Direct Compaction into Tablets
Source: MDPI journal article supplement (doi:10.3390/powders1040016), 2022-11-21
Supplement: s1 [file s1]

Supplementary Materials

# Improving the Powder Properties of an Active Pharmaceutical Ingredient (Ethenzamide) with a Silica Nanoparticle Coating for Direct Compaction into Tablets

Tatsuki Tadauchi, Daiki Yamada, Yoko Koide, Mayumi Yamada, Yasuhiro Shimada, Eriko Yamazoe, Takaaki Ito and Kohei Tahara \*

Laboratory of Pharmaceutical Engineering, Gifu Pharmaceutical University, Gifu 501-1196, Japan

\* Correspondence: tahara@gifu-pu.ac.jp; Tel.: +81-58-230-8100; Fax: +81-58-230-8105

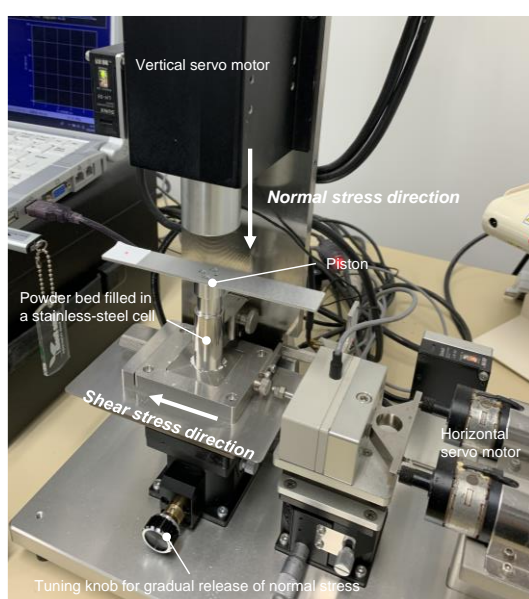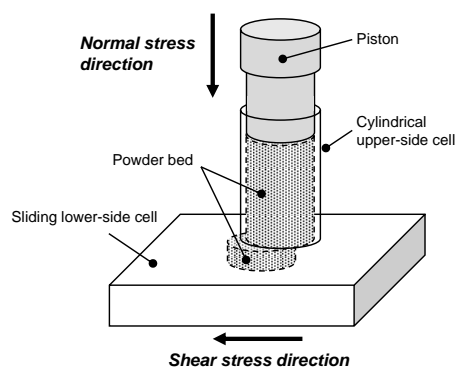

**Figure S1.** Photograph and schematic of the Nanoseeds constant-volume-type shear tester (NS-S500).

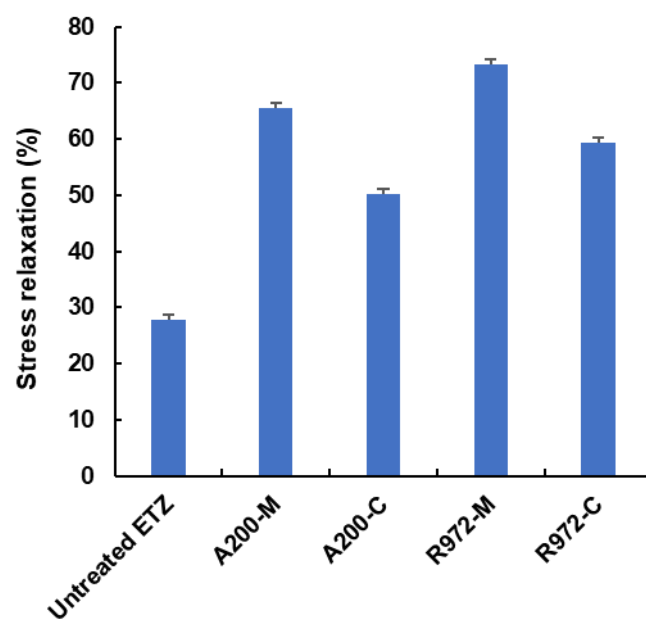

**Figure S2.** Stress relaxation during powder compression in the Nanoseeds constant-volume-type shear tester (NS-S500) (P1→P2 sequence in Figure 2).
